# Supplementary material for: A competitive fluorescence quenching-based immunoassay for bisphenol A employing functionalized silica nanoparticles and nanogold
Source: Royal Society of Chemistry journal article supplement (doi:10.1039/c5ra26366b), 2016-01-01

## **Electronic supplementary information (ESI)**

### **Fluorescence quenching-based assay of bisphenol A by using functionalized silica nanoparticles and nanogold on competitive immunoassay**

Wei Zhao, Wei Ji, Yuanfu Zhang, Lingyun Du, Shuhao Wang\*

*Shandong Provincial Key Laboratory of Chemical Energy Storage and Novel Cell Technology, College of Chemistry and Chemical Engineering, Liaocheng University, Liaocheng 252059, China*

Figure S1. UV-Visible spectrum of colloidal gold stoste and Ag- AuNPs

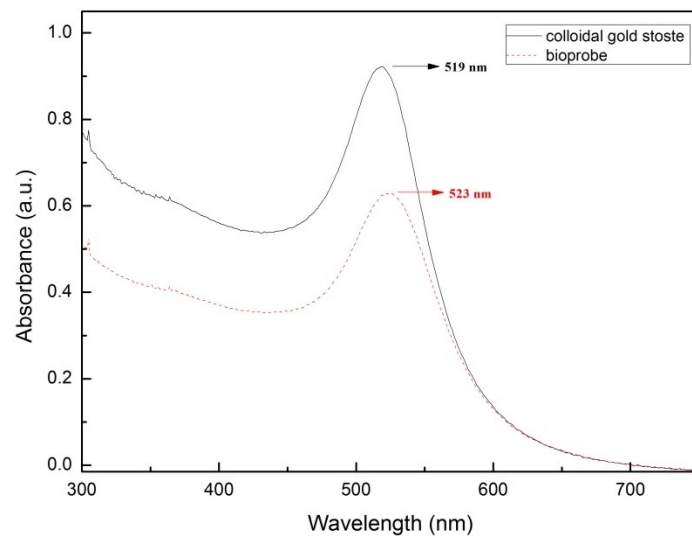

Fig. S2. TEM images of the coating antigen-AuNPs

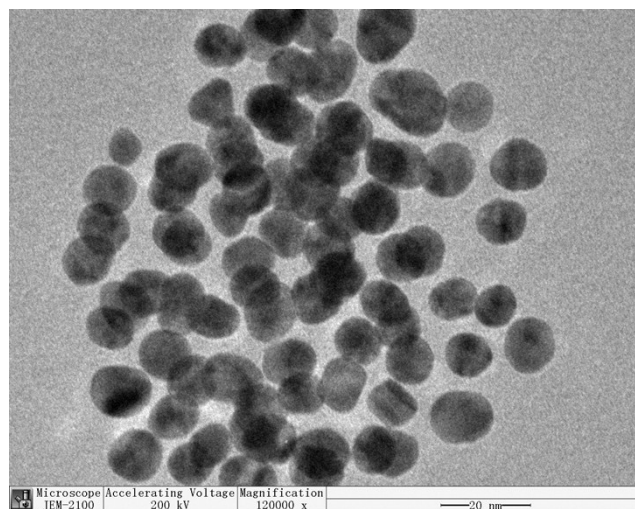

Fig. S3. SEM images of the dual-codified silica nanoparticles

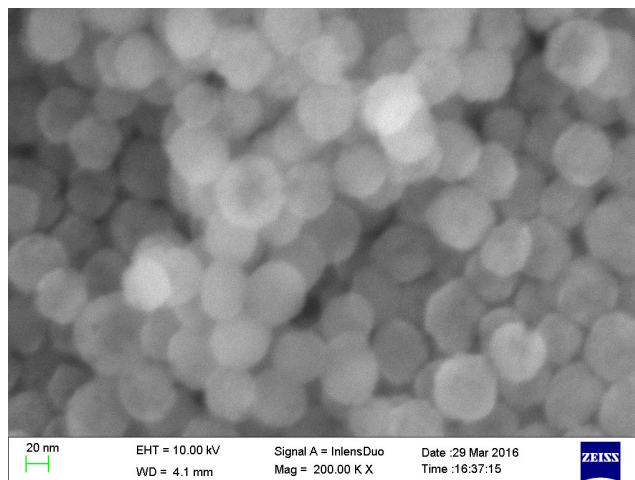

Figure S4. The absorbance of colloidal gold with different concentration of coating antigen from 0.4 mg/mL to 1.4 mg/mL at 580nm.

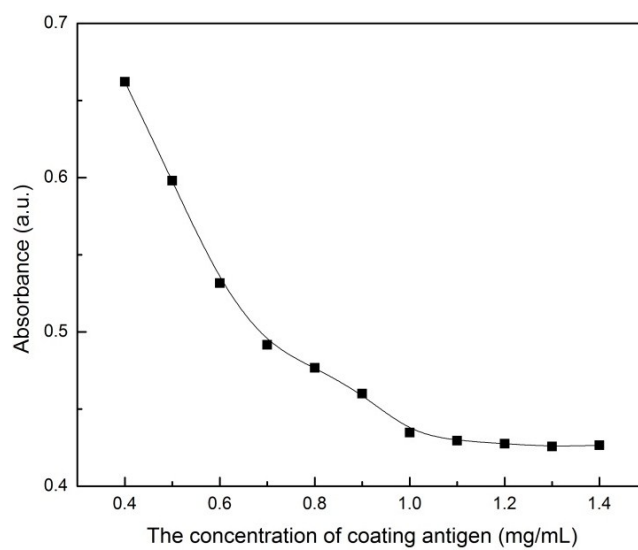

Figure S5. Fluorescence quenching efficiency with different content of DNA:  $e = (1 - F_{DA}/F_D) \times 100\%$ ,  $F_{DA}$  represent the fluorescence intensity of donor and acceptor exist at the same time;  $F_D$  represent the fluorescence intensity of donor only.

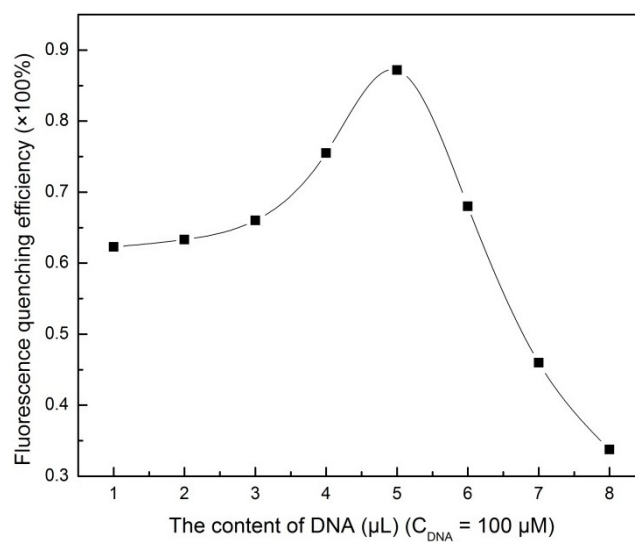

Figure S6. Effects of pH values (a), selectivity (b) and storage time (c) for BPA

detection.

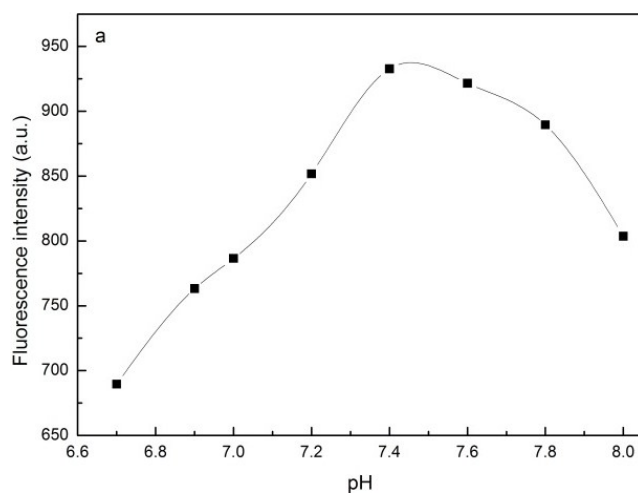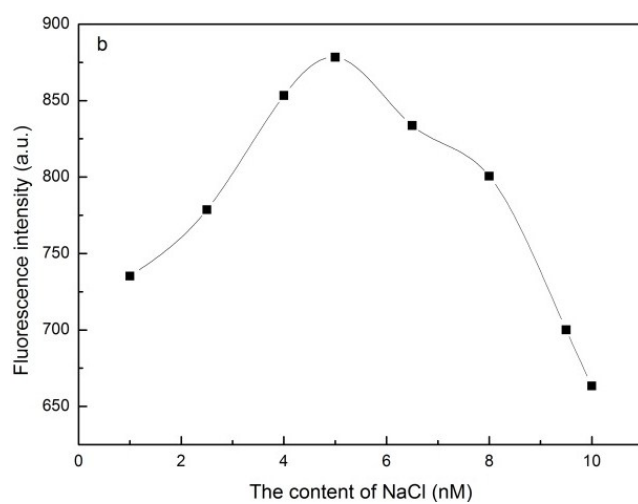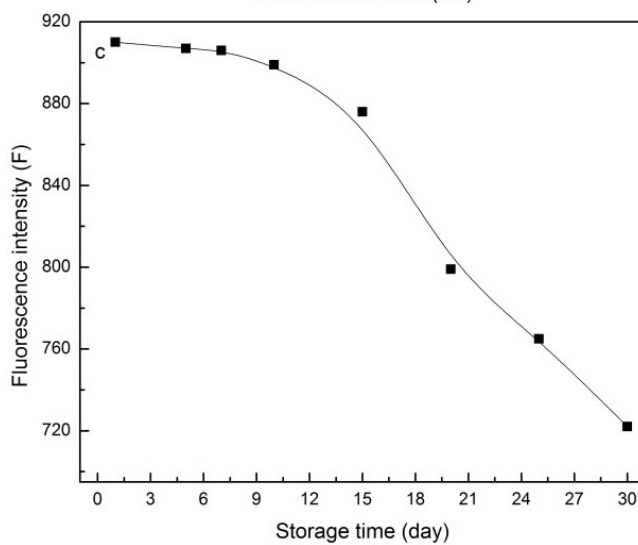

Supplement: c5ra26366b1.pdf [file c5ra26366b1.pdf]
